# Supplementary material for: From theory to experiment: BaFe0.125Co0.125Zr0.75O3−δ, a highly promising cathode for intermediate temperature SOFCs
Source: Royal Society of Chemistry journal article supplement (doi:10.1039/c9ta12208g), 2020-01-01
Supplement: c9ta12208g1.pdf [file c9ta12208g1.pdf]

## ELECTRONIC SUPPLEMENTARY INFORMATION FOR

### **From theory to experiment: $\text{BaFe}_{0.125}\text{Co}_{0.125}\text{Zr}_{0.75}\text{O}_{3-\delta}$ , a highly promising cathode for intermediate temperature SOFCs**

Elena Sánchez-Ahijón,<sup>a</sup> Rafael Marín-Gamero,<sup>a</sup> Beatriz Molero-Sánchez,<sup>b</sup> David Ávila-Brandé,<sup>a</sup> Alicia Manjón-Sanz,<sup>c</sup> M.Teresa Fernández-Díaz,<sup>d</sup> Emilio Morán,<sup>a</sup> Rainer Schmidt,<sup>e</sup> Jesús Prado-Gonjal<sup>\*a,f</sup>

---

<sup>a</sup> Dpto. Química Inorgánica, Universidad Complutense de Madrid, E-28040 Madrid (Spain)

<sup>b</sup> SeeO2 Energy Inc, 3655 36 St NW, Calgary, AB T2L 1Y8, Canada

<sup>c</sup> CELLS-ALBA synchrotron, Cerdanyola del Vallés, Barcelona, E-08290 (Spain)

<sup>d</sup> Institute Laue Langevin, BP 156X, Grenoble F-38042, France

<sup>e</sup> GFMC, Dpto. Física de Materiales, Facultad de Ciencias Físicas, Universidad Complutense de Madrid, E-28040 Madrid (Spain)

<sup>f</sup> Instituto de Ciencia de Materiales de Madrid (ICMM), Consejo Superior de Investigaciones Científicas (CSIC), Sor Juana Inés de la Cruz 3, E-28049, Madrid, Spain

\* corresponding author: [jpradogo@ucm.es](mailto:jpradogo@ucm.es)

**SI1 – Synchrotron X-ray diffraction**

**SI2 – Neutron diffraction**

**SI3 – X-ray thermodiffraction and Thermal Expansion Coefficient (TEC)**

**SI4 – Impedance Spectroscopy of the cells (Heating and cooling)**

## SI1 – Synchrotron X-ray diffraction

Table SI1.1. Refined structural parameters obtained from synchrotron X-ray diffraction for  $\text{BaFe}_{0.125}\text{Co}_{0.125}\text{Zr}_{0.75}\text{O}_{3-6}$  (BFCZO) at room temperature in the space group  $Pm\bar{3}m$ . Occupancy values for the BFCZO phase are fixed to the result obtained by neutron diffraction data. Information about the secondary phase,  $\text{BaZrO}_3$  (BZO) is also added.

| Phases                            | BFCZO     | BZO       |
|-----------------------------------|-----------|-----------|
| Lattice parameter, $a / \text{Å}$ | 4.1863(1) | 4.1798(1) |
| Occ. Ba                           | 0.3333    | 0.3333    |
| Occ. Fe                           | 0.042     | 0         |
| Occ. Co                           | 0.044     | 0         |
| Occ. Zr                           | 0.248     | 0.3333    |
| Occ. O (1)                        | 0.966     | 1         |
| $R_p$ (%)                         | 3.77      |           |
| $R_{wp}$ (%)                      | 5.09      |           |
| $R_{exp}$ (%)                     | 1.49      |           |
| Bragg $R$ -factor                 | 3.33      | 1.2       |

## SI2 – Neutron diffraction

Rietveld refinement  
(anisotropic oxygen)

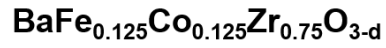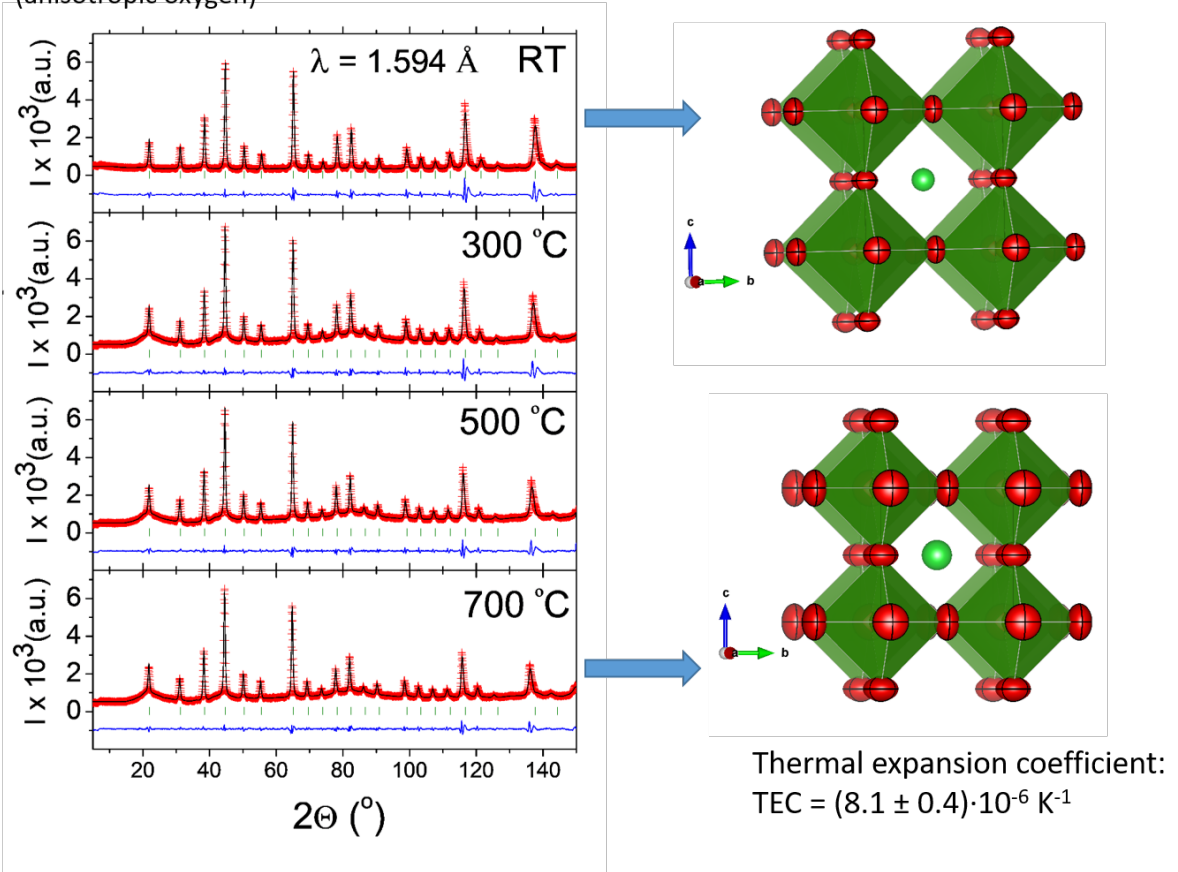

Fig SI2.1. Anisotropic atomic displacement analysis of oxygen atoms from Neutron powder diffraction data: Illustration of the perovskite crystal structure including 95% probability displacement ellipsoids for room temperature and 700 °C data.

### SI3 –X-ray thermodiffraction and Thermal Expansion Coefficient (TEC)

X-ray thermodiffraction was performed from room temperature to 1100 °C on a PANalytical modelo X'Pert PRO diffractometer using Cu radiation.

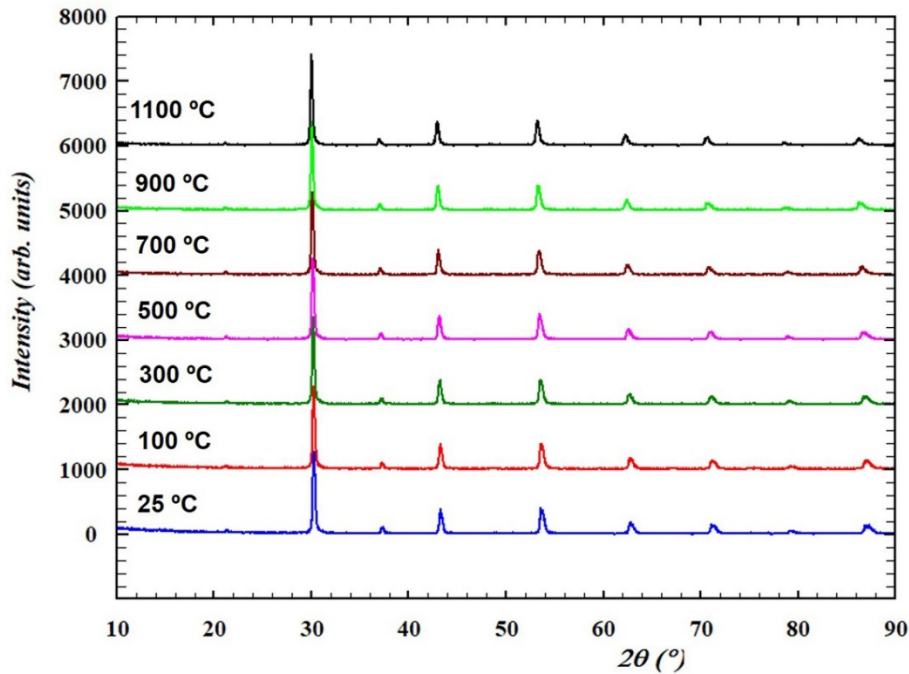

Figure SI3.1. X-ray thermodiffraction of BaFe<sub>0.125</sub>Co<sub>0.125</sub>Zr<sub>0.75</sub>O<sub>3-6</sub>

Table SI3.1. Temperature dependence of the cell parameters obtained from Le Bail analysis.

| T (°C) | a (Å)     |
|--------|-----------|
| 25     | 4.1878(1) |
| 100    | 4.1916(1) |
| 300    | 4.1980(1) |
| 500    | 4.2051(1) |
| 700    | 4.2098(1) |
| 900    | 4.2181(1) |
| 1100   | 4.2245(1) |

The thermal expansion coefficient was determined using the lattice parameters at different temperatures by the expression:

$$TEC = \frac{(a_{T_2} - a_{T_1}) / a_{T_1}}{\Delta T}$$

where  $a_{T_x}$  is the lattice parameter at a selected temperature and  $\Delta T$  corresponds to the difference of temperature. A TEC value of  $8.0 \times 10^{-6} \text{ K}^{-1}$  is found from room temperature to 1100 °C.

### SI4 – Impedance Spectroscopy of the cells (Heating and cooling)

Table SI4.1. Area specific polarization resistance (ASRp) and ohmic resistance (ASRs) for the symmetrical cells tested in stagnant air in a 2-electrode configuration (heating process).

| T (°C)                              | 500  | 550  | 600  | 650  | 700  | 750  | 800  |
|-------------------------------------|------|------|------|------|------|------|------|
| <b>BFCZO Cell</b>                   |      |      |      |      |      |      |      |
| ASRp ( $\Omega \cdot \text{cm}^2$ ) | 7.19 | 3.39 | 1.47 | 0.66 | 0.33 | 0.22 | 0.13 |
| ASRs ( $\Omega \cdot \text{cm}^2$ ) | 7.21 | 4.85 | 3.37 | 2.50 | 1.97 | 1.48 | 1.18 |
| <b>BFCZO-GDC cell</b>               |      |      |      |      |      |      |      |
| ASRp ( $\Omega \cdot \text{cm}^2$ ) | 5.89 | 2.13 | 0.83 | 0.33 | 0.13 | 0.08 | 0.05 |
| ASRs ( $\Omega \cdot \text{cm}^2$ ) | 7.64 | 4.82 | 3.28 | 2.35 | 1.78 | 1.31 | 1.02 |

BFCZO cell:

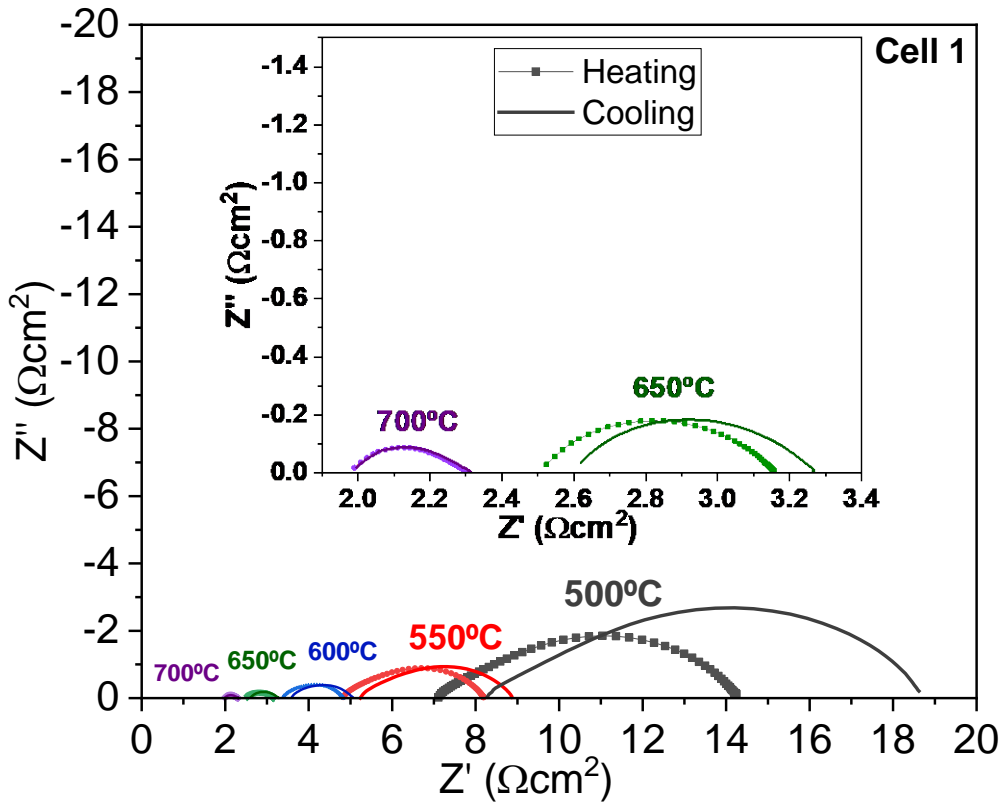

Fig SI4.1. Impedance spectroscopy data from a BFCZO symmetrical cell in a 2-electrode configuration from 500 °C to 700 °C during heating and cooling. Insets show the spectra at 650 °C and 700 °C zoomed in.

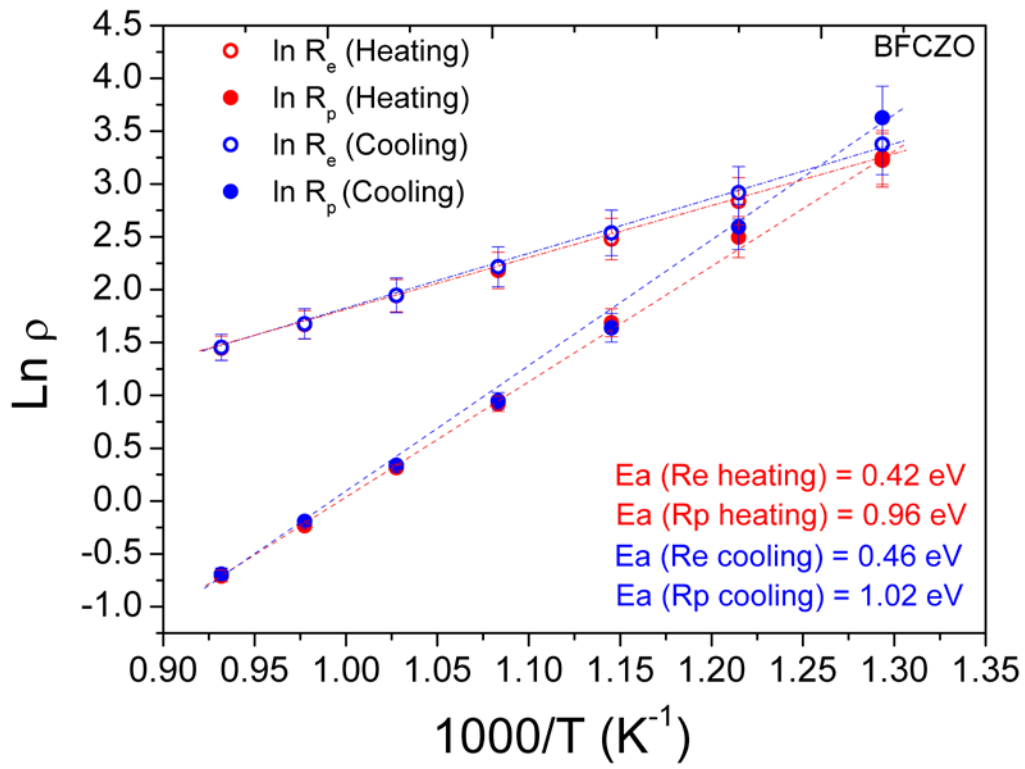

Figure S14.2. Temperature dependence of the resistivity for BFCZO cell during heating and cooling processes.

BFCZO-GDC cell:

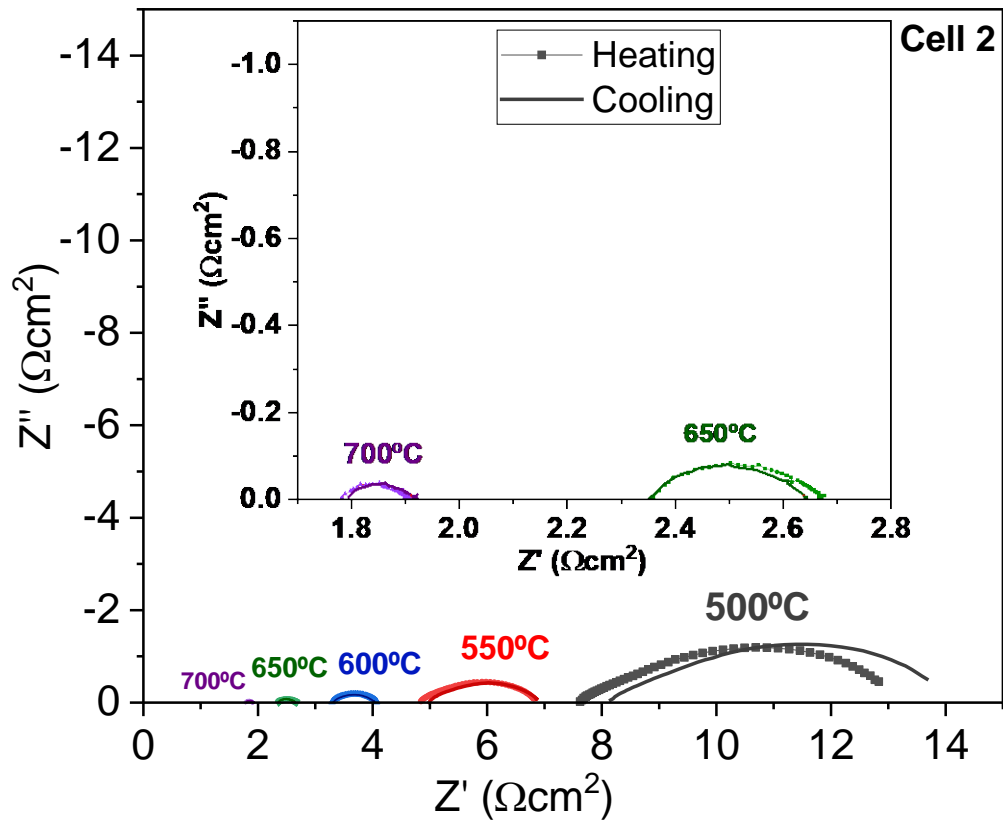

Fig SI4.3. Impedance spectroscopy data from a BFCZO-GDC symmetrical cell in a 2-electrode configuration from 500 °C to 700 °C during heating and cooling. Insets show the spectra at 650 °C and 700 °C zoomed in.

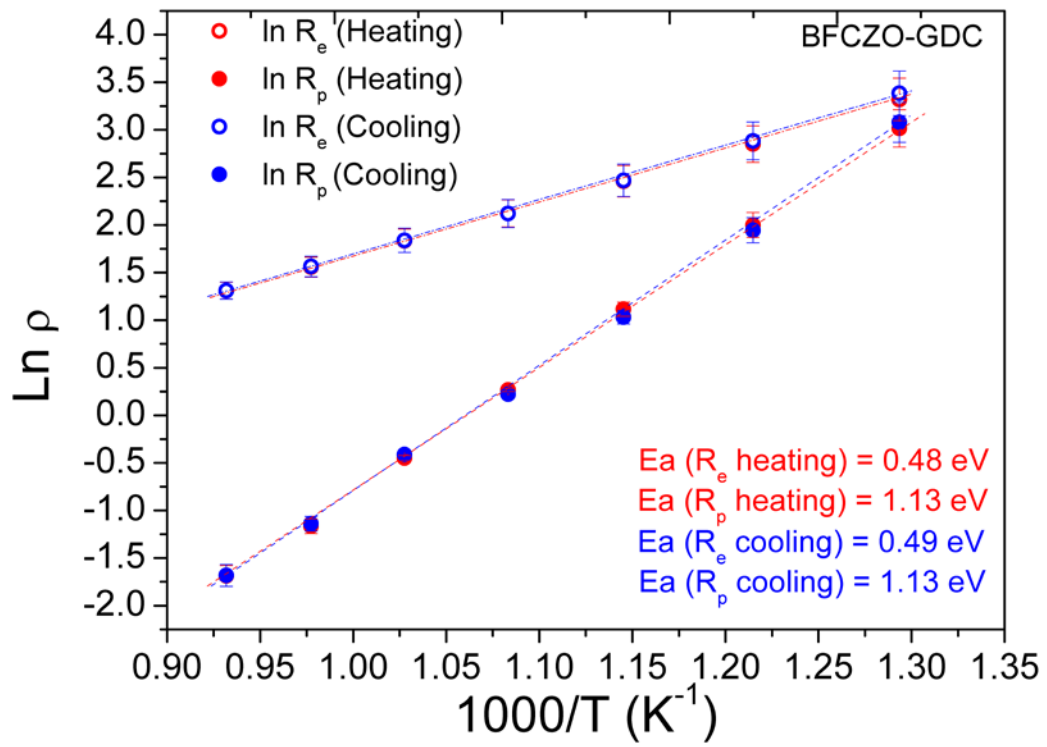

Figure SI4.4. Temperature dependence of the resistivity for BFCZO-GDC cell during heating and cooling processes.
